# Supplementary material for: Infrared radiation-assisted thermochemical vapor generation for mercury speciation by atomic absorption spectrometry
Source: Royal Society of Chemistry journal article supplement (doi:10.1039/d3ja00108c), 2023-01-01
Supplement: d3ja00108c1.pdf [file d3ja00108c1.pdf]

\* Corresponding author: [gslopes@ufc.br](mailto:gslopes@ufc.br)

## Electronic Supplementary Material

### Study of the chemical kinetic of TVG-IR system

The application of the integrated rate laws for  $\text{Hg}^{2+}$  and  $\text{CH}_3\text{Hg}^+$  was unsuccessful when trying to fit the experimental data to a zero, first or second order reaction (Figures 1 and 2). It can be seen that the rate of reduction accelerates as the reaction proceeds, possibly indicating multiple order, a sequential process with different reductants/intermediates, or a varying concentration of a key reactant. It was not possible to adapt the data obtained to a second order (Figure 1 (c) and 2 (c)), even though this could be a possible second order reaction in the initial stage (possible adaptation of the data to a linear fit), these data from the initial period were used to plot the graph shown in Figure 1 (d) and 2 (d) separately, not being possible to adjust this to a linear fit. The inability to achieve a first order (Figure 1 (b)) adequate to the data suggests that the thermal decomposition products of formic acid may promote a subsequent secondary reduction of  $\text{Hg}^{2+}$  and, in this case, the kinetics of the reaction may also be influenced by the formation of reducing intermediates such as  $\cdot\text{H}$ ,  $\text{CO}$ ,  $\cdot\text{HCOO}$  or  $\cdot\text{HCO}$  formed during the thermal decomposition process of formic acid.<sup>22</sup>

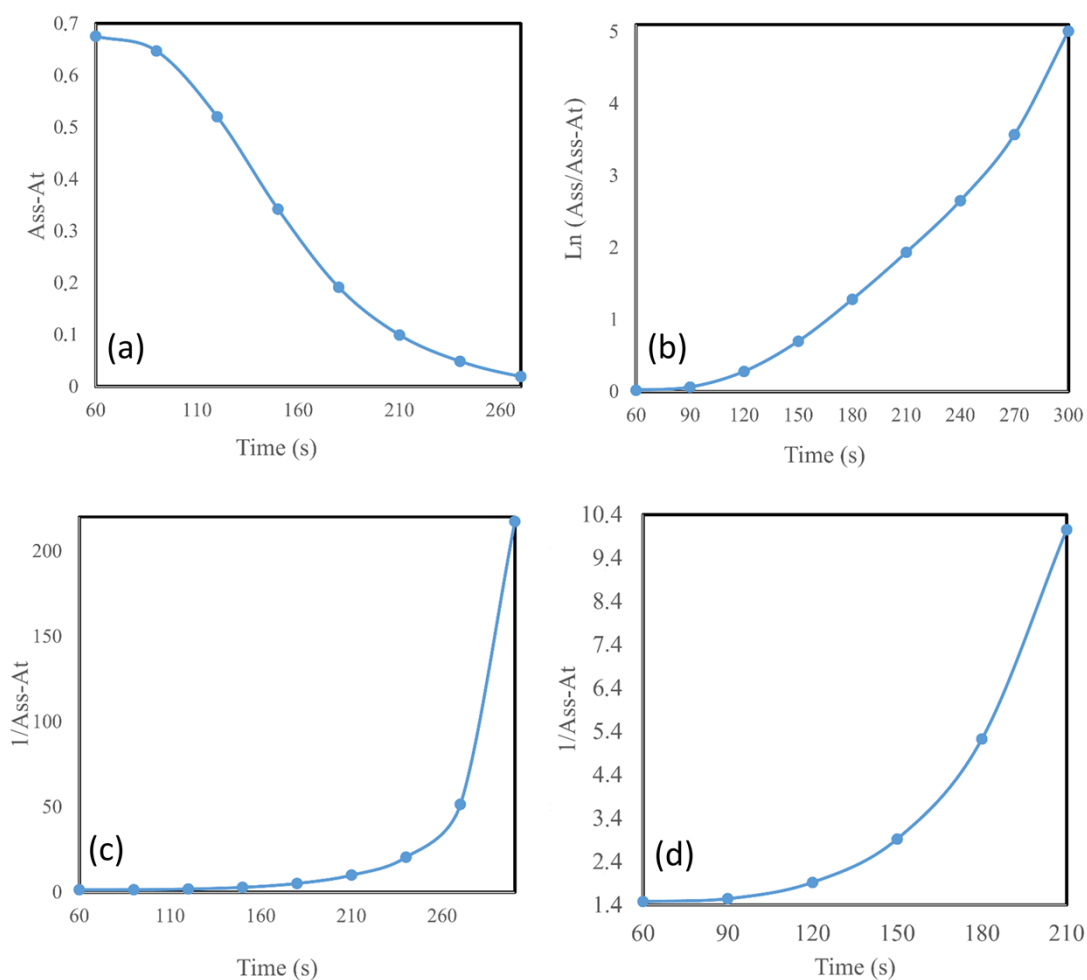

**Figure 1.** Fitting data for a  $20 \mu\text{g L}^{-1}$  of  $\text{Hg}^{2+}$  reduction in 2% formic acid using TVG-IR to (a) zero-order kinetic plot; (b) first order; (c) second order in the interval from 60 to 300s and (d) second order in the interval from 60 to 210s. Note, for convenience: Ass = Absorbance measured in the period of the steady state signal, At = Absorbance measured in the t (time period).

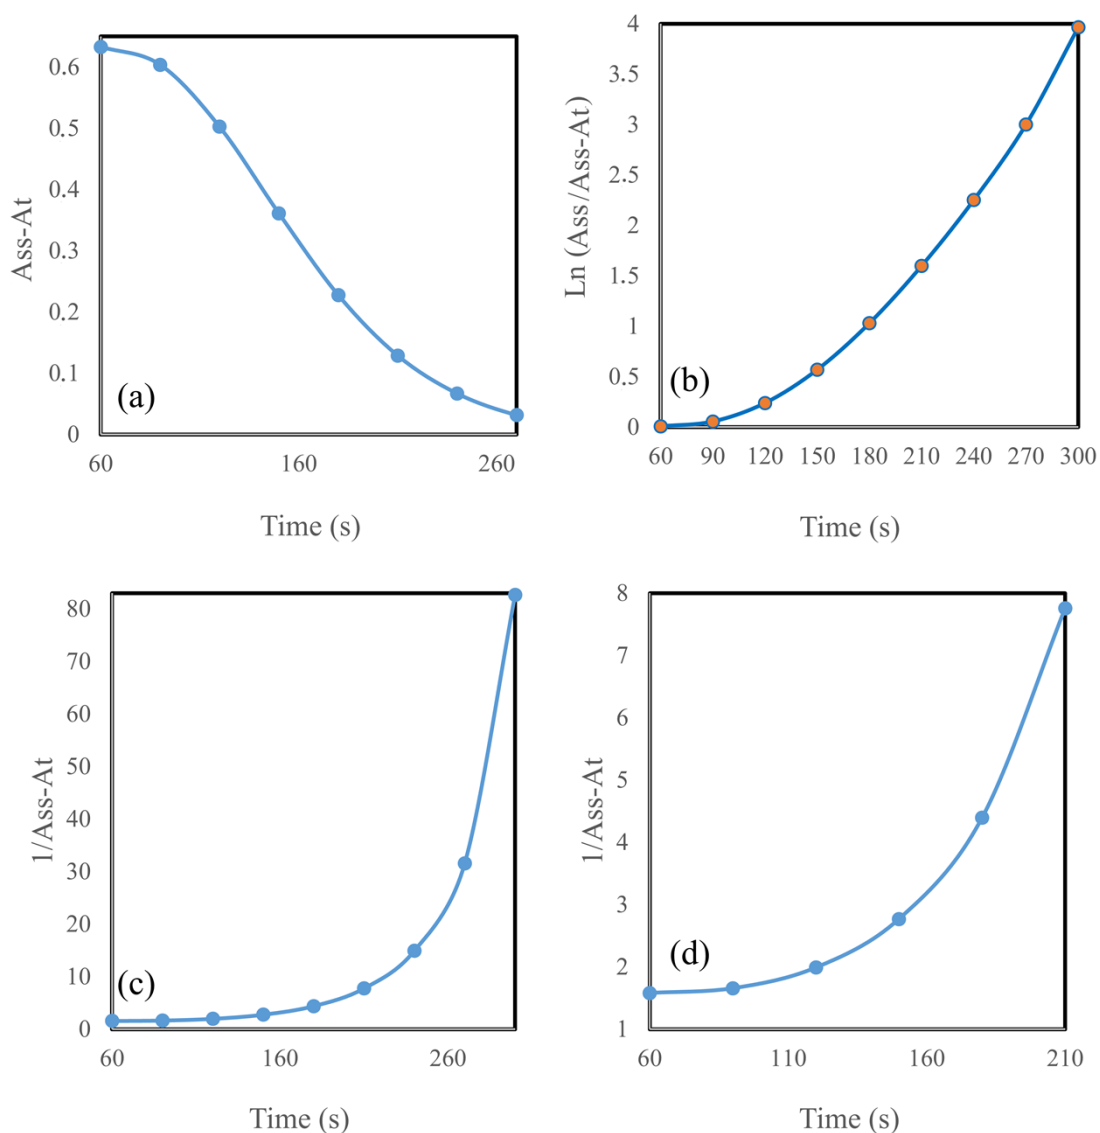

**Figure 2.** Fitting data for a  $20 \mu\text{g L}^{-1}$  of  $\text{Hg}^{2+}$  reduction in 2% formic acid and hydrogen peroxide  $0.25\% \text{ v v}^{-1}$  using TVG-IR to (a) zero-order kinetic plot; (b) first order; (c) second order in the interval from 60 to 300s and (d) second order in the interval from 60 to 210s (d). Note, for convenience:  $\text{Ass}$  = Absorbance measured in the period of the steady state signal,  $\text{At}$  = Absorbance measured in the  $t$  (time period).

Sturgeon and Luong<sup>8</sup> investigated the kinetic profile of the thermochemical generation of mercury vapor by conductive heating in an oil bath at  $87.4 \text{ }^\circ\text{C}$ , and observed that

the variation of the formic acid concentration in the range of 2 to 8% had no perceptible impact on the format of the integrated response curve. The response curves obtained by the authors could be readily fitted to a pseudo-first-order integrated rate equation. In this system, complete reduction (As-s) occurred in 8 minutes. For comparative purposes, the authors also performed reduction reactions in an oil bath of 82 °C that revealed first-order kinetics for  $\text{Hg}^{2+}$ .
